# Supplementary material
Source: PubMed Central journal article supplement (PMC3190871)
Supplement: supp_M111.274167_jbc.M111.274167-1.pdf [file supp_M111.274167_jbc.M111.274167-1.pdf]

## Supplementary Information

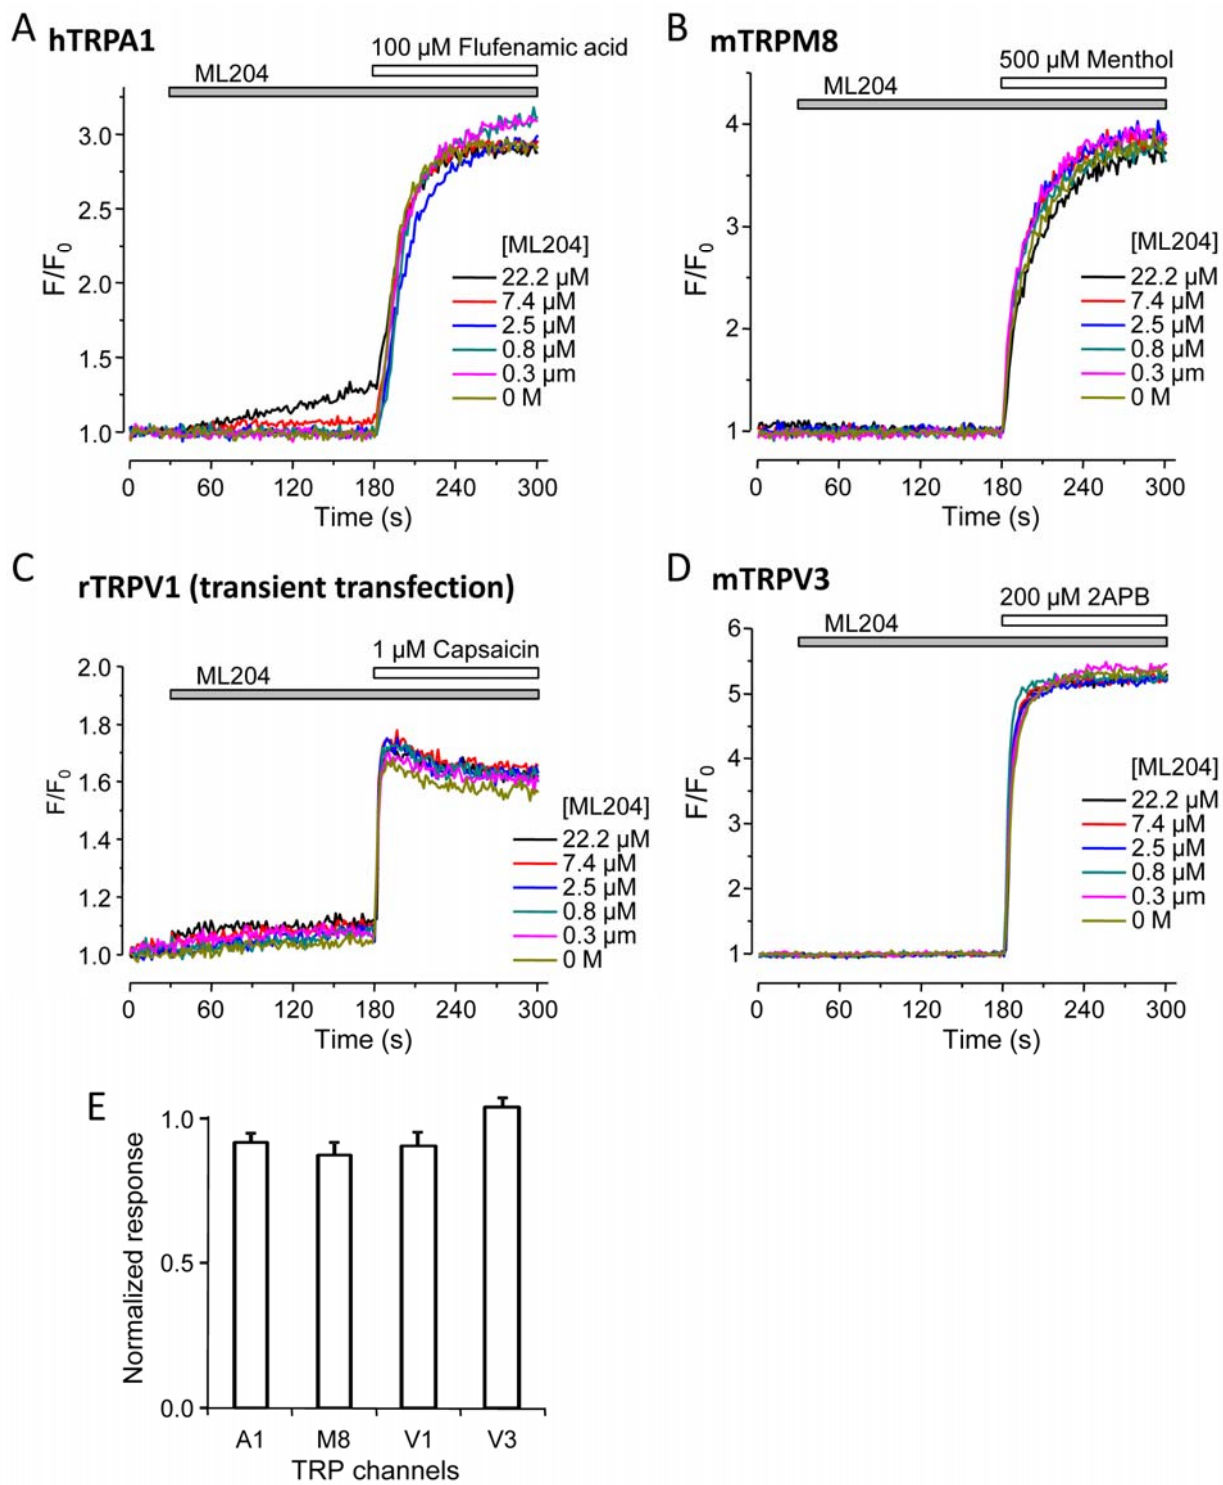

**Figure S1.** Lack of effect of ML204 on TRPA1, TRPM8, TRPV1, and TRPV3. (A-D), HEK293 cells expressing human TRPA1 (A), mouse TRPM8 (B), mouse TRPV3 (C), and rat TRPV1 (D) were seeded in wells of 96-well plates and loaded with Fluo4-AM. Fluorescence changes were read using FlexStation (Molecular Devices, Inc.). Different concentrations of ML204 were added as indicated and corresponding channel agonists were applied 2.5 min later. No obvious inhibition was observed with ML204. At high concentrations, ML204 caused weak and slow activation of TRPA1. (E), summary of peak agonist-induced response in the presence of 22.2  $\mu$ M ML204 normalized to that in the absence of the compound. Data are means  $\pm$  SEM of 8 measurements.
