# Supplementary material
Source: PubMed Central journal article supplement (PMC3190871)
Supplement: supp_M111.274167_jbc.M111.274167-2.pdf [file supp_M111.274167_jbc.M111.274167-2.pdf]

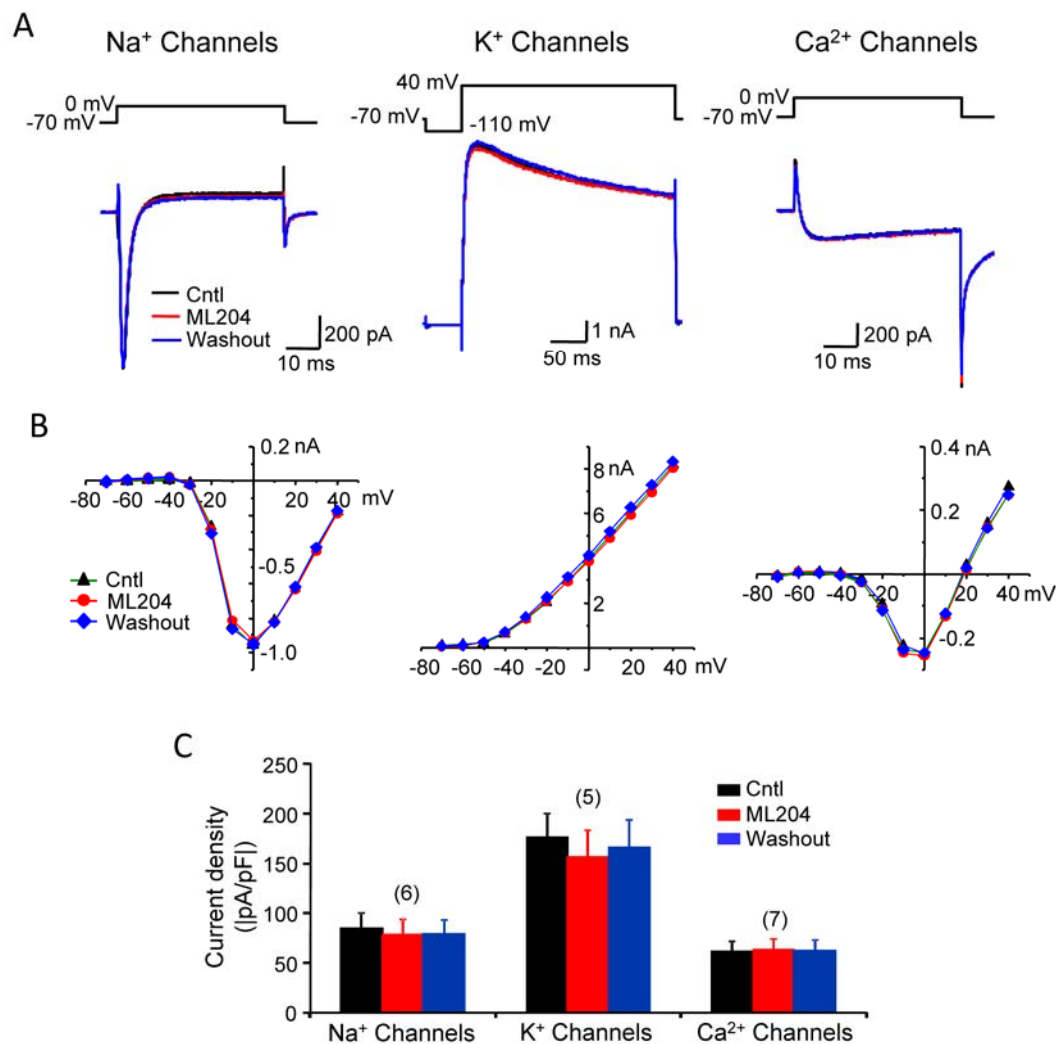

**Figure S2.** ML204 has no effect on voltage-gated Na<sup>+</sup>, K<sup>+</sup> and Ca<sup>2+</sup> currents in DRG neurons. (A), representative currents traces evoked by step depolarizations at the voltages indicated by the protocol (*top panel*), before (*Cntl*, *black*), during (*ML204*, *red*) and after (*washout*, *blue*) the treatment with 10  $\mu$ M ML204. (B), current-voltage relations for each type of channels. Data are peak current amplitudes evoked by different voltage pulses from the same cells shown in A. (C), summary of current densities (means  $\pm$  SEM of absolute values) for Na<sup>+</sup>, K<sup>+</sup> and Ca<sup>2+</sup> channels evoked by voltage pulses at 0, +40, and 0 mV, respectively, before (*black*), during (*red*) and after washout (*blue*) of ML204 (10  $\mu$ M). The numbers of cells are indicated in parentheses.
